# Supplementary material
Source: PubMed Central journal article supplement (PMC518782)

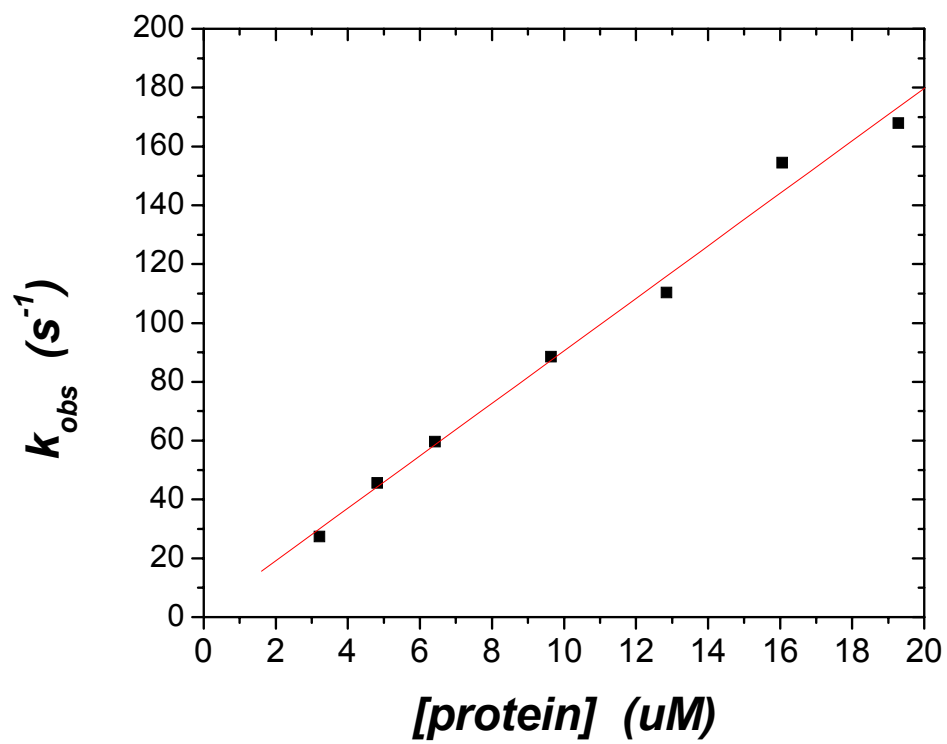

Supplement: pnas_101_37_13478__1.pdf [file pnas_101_37_13478__1.pdf]

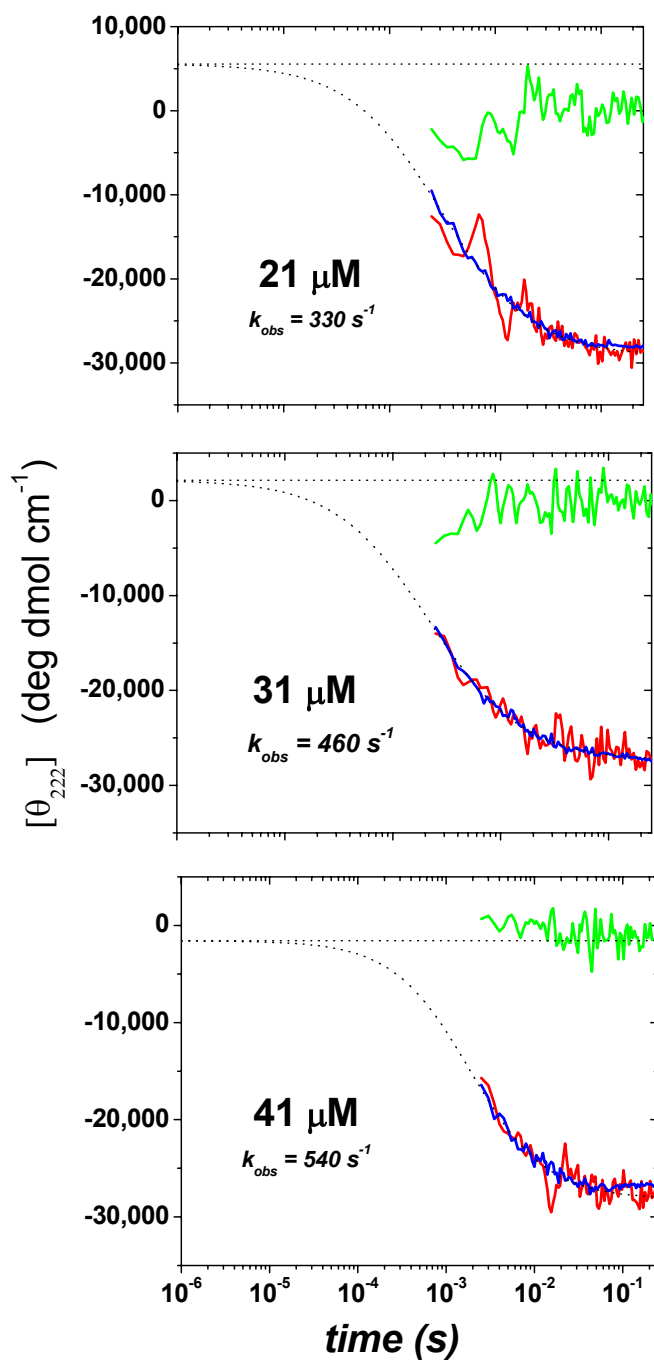

Supplement: pnas_101_37_13478__2.pdf [file pnas_101_37_13478__2.pdf]

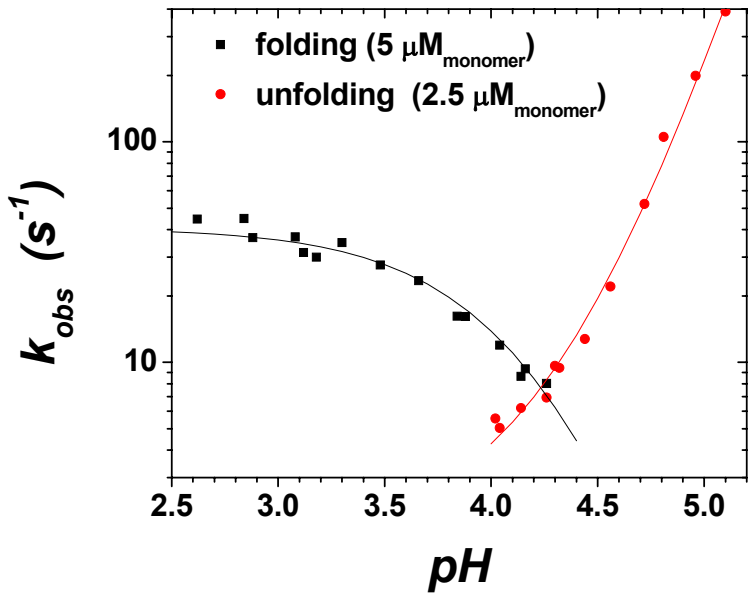

Supplement: pnas_101_37_13478__3.pdf [file pnas_101_37_13478__3.pdf]
